# Supplementary material for: Arrangement effect of the di-μ-oxo dimanganese catalyst and Ru(bpy)32+ photoexcitation centers adsorbed on mica for visible-light-derived water oxidation
Source: Royal Society of Chemistry journal article supplement (doi:10.1039/c3cy00010a), 2013-01-01
Supplement: c3cy00010a.pdf [file c3cy00010a.pdf]

Supporting Information for

Arrangement effect of di- $\mu$ -oxo dimanganese catalyst and

$\text{Ru}(\text{bpy})_3^{2+}$  photoexcitation centers adsorbed in mica on

visible-light-derived water oxidation

Masanari Hirahara,<sup>a</sup> Hirosato Yamazaki,<sup>a</sup> Satoshi Yamada,<sup>a</sup> Kazuki Matsubara,<sup>a</sup> Kenji Saito,<sup>a,b</sup>  
Tatsuto Yui,<sup>a</sup> Masayuki Yagi\*<sup>a,b</sup>

<sup>a</sup>Department of Materials Science and Technology, Faculty of Engineering, and Center for Transdisciplinary Research, Niigata University, 8050 Ikarashi-2, Niigata 950-2181, Japan

<sup>b</sup>Precursory Research for Embryonic Science (PRESTO), Japan Science and Technology Agency (JST), 4-1-8 Honcho, Kawaguchi, Saitama 332-0012, Japan

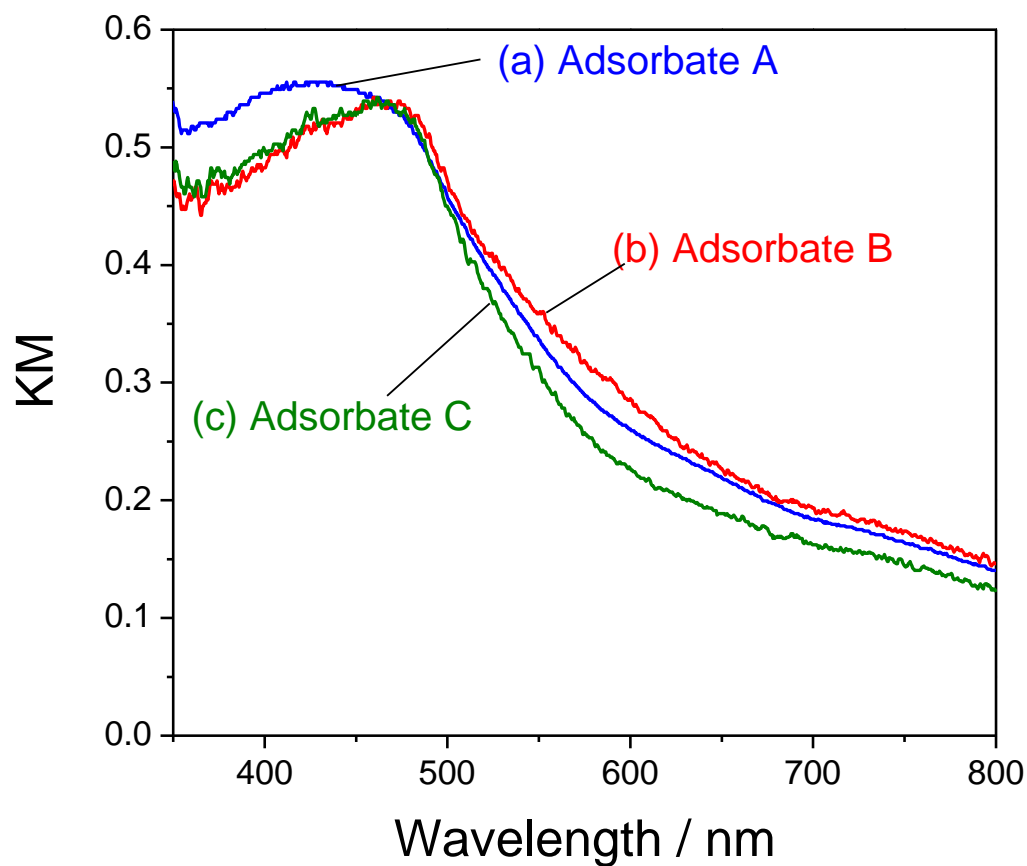

**Figure S1.** UV-vis DR spectra of the mica adsorbates (20 mg). (a) Adsorbate A (mica / **1** / Ru(bpy)<sub>3</sub><sup>2+</sup>) ( $w_{\text{Mn}} = 164 \mu\text{mol g}^{-1}$ ,  $w_{\text{Ru}} = 30 \mu\text{mol g}^{-1}$ ), (b) Adsorbate B (mica / Ru(bpy)<sub>3</sub><sup>2+</sup> / **1**) ( $w_{\text{Mn}} = 164 \mu\text{mol g}^{-1}$ ,  $w_{\text{Ru}} = 100 \mu\text{mol g}^{-1}$ ), and (c) Adsorbate C (mica / (**1** + Ru(bpy)<sub>3</sub><sup>2+</sup>)) ( $w_{\text{Mn}} = 164 \mu\text{mol g}^{-1}$ ,  $w_{\text{Ru}} = 75 \mu\text{mol g}^{-1}$ )

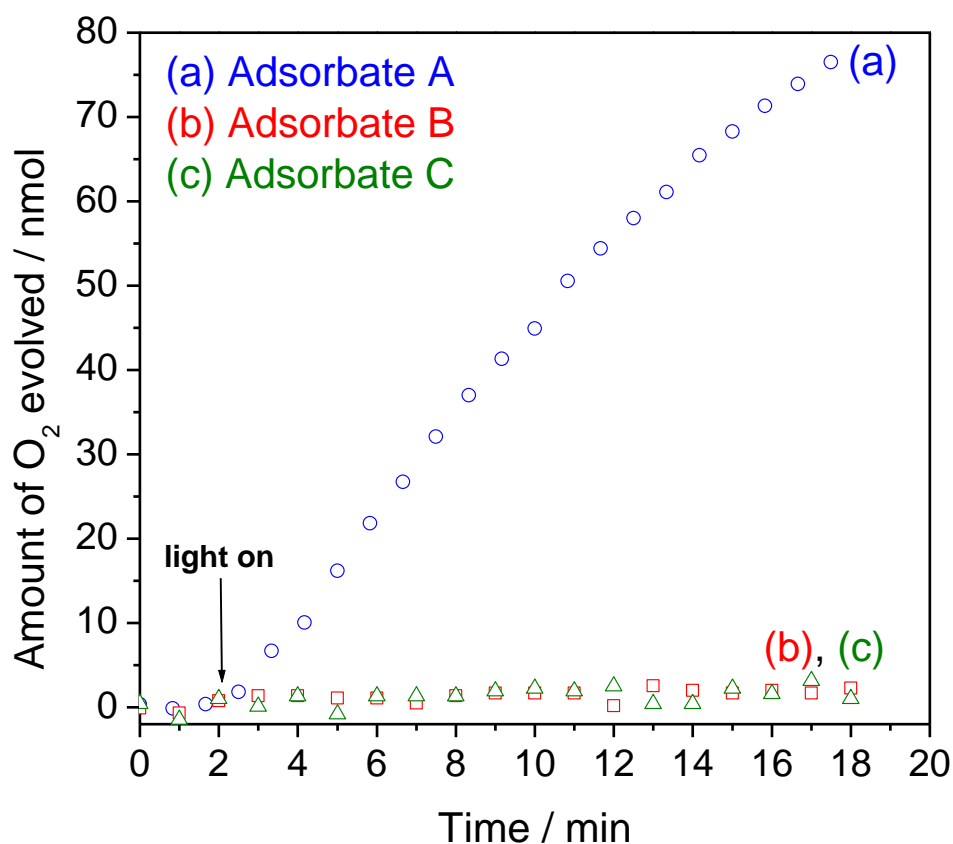

**Figure S2.** Time courses of the amount of O<sub>2</sub> evolved in photochemical water oxidation in an aqueous suspension of 0.2 M acetate buffer (2.0 ml, pH = 6.2) and 15 mM S<sub>2</sub>O<sub>8</sub><sup>2-</sup> containing (a) Adsorbate A (mica / **1** / Ru(bpy)<sub>3</sub><sup>2+</sup>) ( $w_{\text{Mn}} = 164 \mu\text{mol g}^{-1}$ ,  $w_{\text{Ru}} = 30 \mu\text{mol g}^{-1}$ , 20 mg mica), (b) Adsorbate B (mica / Ru(bpy)<sub>3</sub><sup>2+</sup> / **1**) ( $w_{\text{Mn}} = 164 \mu\text{mol g}^{-1}$ ,  $w_{\text{Ru}} = 100 \mu\text{mol g}^{-1}$ , 20 mg mica), and (c) Adsorbate C (mica / (**1** + Ru(bpy)<sub>3</sub><sup>2+</sup>) ) ( $w_{\text{Mn}} = 164 \mu\text{mol g}^{-1}$ ,  $w_{\text{Ru}} = 75 \mu\text{mol g}^{-1}$ , 20 mg mica). A 150 W halogen lamp with a UV-cut filter, ( $\lambda > 420 \text{ nm}$ ,  $127 \text{ mW cm}^{-2}$ ) was used as a light source.
